# Supplementary material for: Age-stratified and blood-pressure-stratified effects of blood-pressure-lowering pharmacotherapy for the prevention of cardiovascular disease and death: an individual participant-level data meta-analysis
Source: PubMed Central journal article supplement (PMC8473559; doi:10.1016/s0140-6736(21)01921-8), 2021-09-18
Supplement: mmc1.pdf [file mmc1.pdf]

# THE LANCET

## Supplementary appendix

This appendix formed part of the original submission and has been peer reviewed. We post it as supplied by the authors.

Supplement to: The Blood Pressure Lowering Treatment Trialists' Collaboration. Age-stratified and blood-pressure-stratified effects of blood-pressure-lowering pharmacotherapy for the prevention of cardiovascular disease and death: an individual participant-level data meta-analysis. *Lancet* 2021; published online Aug 27. [http://dx.doi.org/10.1016/S0140-6736\(21\)01921-8](http://dx.doi.org/10.1016/S0140-6736(21)01921-8).

# Supplementary Materials

## Contents

|                                                                                                                                                                       |    |
|-----------------------------------------------------------------------------------------------------------------------------------------------------------------------|----|
| Supplementary Materials .....                                                                                                                                         | 1  |
| Table S1. A comparison of the difference in clinical guidelines regarding the age of patients.....                                                                    | 2  |
| Table S2. Characteristics of randomised clinical trials included in the analysis. ....                                                                                | 3  |
| Table S3. Unstandardised effects of systolic blood pressure-lowering treatment on primary and secondary outcomes, stratified by age categories and trial design. .... | 7  |
| Figure S1. Effects of diastolic blood pressure-lowering treatment on primary and secondary outcomes, stratified by age categories.....                                | 8  |
| Figure S2. Age-specific relative effects of blood pressure-lowering treatment on all-cause death, by systolic blood pressure categories at baseline. ....             | 9  |
| Figure S3. Age-specific relative effects of blood pressure-lowering treatment on all-cause death, by diastolic blood pressure categories at baseline. ....            | 10 |
| Figure S4. The unstandardised effects of blood pressure-lowering treatment on risk of primary and secondary outcomes stratified by age categories. ....               | 11 |
| References .....                                                                                                                                                      | 12 |

Table S1. A comparison of the difference in clinical guidelines regarding the age of patients.

|                                                       | <b>ACC/AHA<br/>2017</b> | <b>ACP/AAFP<br/>2017</b> | <b>ESC/ESH 2018</b>                           | <b>ISH 2020</b> | <b>NICE 2019</b> |
|-------------------------------------------------------|-------------------------|--------------------------|-----------------------------------------------|-----------------|------------------|
| <b>Definition of older patients</b>                   | ≥65 years               | ≥60 years                | Elderly 65-79 years<br>Very old ≥80 years     | ≥65 years       | Over 80 years    |
| <b>BP threshold for initiation of pharmacotherapy</b> | ≥130/80 mmHg            | SBP ≥150 mmHg            | Elderly ≥140/90 mmHg<br>Very old ≥160/90 mmHg | ≥140/90 mmHg    | >150/90 mmHg     |
| <b>Blood pressure target</b>                          | <130/80 mmHg            | SBP <150 mmHg            | SBP 130-139 mmHg<br>DBP 70-79mmHg             | <140/90 mmHg    | No target        |

BP: blood pressure, SBP: systolic blood pressure, DBP: diastolic blood pressure, ACC/AHA: the American College of Cardiology/American Heart Association, ACP: The American College of Physicians, AAFP: American Academy of Family Physicians, ESC/ESH: European Society of Cardiology/ European Society of Hypertension, ISH: International Society of Hypertension. NICE: The National Institute for Health and Care Excellence, England

Table S2. Characteristics of randomised clinical trials included in the analysis.

| Trial                    | Type of trial           | Setting            | Follow-up duration (years) | Age groups              |                     |                     |                     |                         | Intervention                        | Comparator                           | Definition of Primary outcome              | DBP difference (mmHg) excluding first 12 months | SBP difference (mmHg) excluding first 12 months | Inclusion criteria                                                                                                                                                                                                                                                                                                               | Exclusion criteria                                                                                                                                                           |
|--------------------------|-------------------------|--------------------|----------------------------|-------------------------|---------------------|---------------------|---------------------|-------------------------|-------------------------------------|--------------------------------------|--------------------------------------------|-------------------------------------------------|-------------------------------------------------|----------------------------------------------------------------------------------------------------------------------------------------------------------------------------------------------------------------------------------------------------------------------------------------------------------------------------------|------------------------------------------------------------------------------------------------------------------------------------------------------------------------------|
|                          |                         |                    |                            | Aged less than 55 years | Aged 55 to 64 years | Aged 65 to 74 years | Aged 75 to 85 years | Aged 85 years or higher | No. of participants                 | No. of participants                  |                                            |                                                 |                                                 |                                                                                                                                                                                                                                                                                                                                  |                                                                                                                                                                              |
| AASK <sup>1</sup>        | Intensive               | USA                | 4.8                        | 524                     | 356                 | 214                 | 0                   | 0                       | More intensive (540)                | Less intensive (554)                 | MI, Stroke, HF, CVD death                  | 7.9                                             | 13.0                                            | Age 18-70 years, African-American, hypertension, renal disease (GFR=20-65 ml/min per 1.73m <sup>2</sup> )                                                                                                                                                                                                                        | DBP <95 mmHg, diabetes, urine protein:creatinine ratio >25, recent malignant or hypertension, non-blood pressure-related CKD, serious systemic disease, heart failure        |
| ABCD <sup>2</sup>        | Intensive               | USA                | 4.7                        | 337                     | 365                 | 246                 | 2                   | 0                       | More intensive (474)                | Less intensive (476)                 | MI or IHD, Stroke, HF, CVD death           | 6.9                                             | 7.7                                             | Age 0-74 years, with T2D, DBP ≥80 mmHg, not on antihypertensive treatment                                                                                                                                                                                                                                                        | Recent CAD or CeVD, heart failure, renal disease                                                                                                                             |
| ACCORD <sup>3</sup>      | Intensive               | USA and Canada     | 4.7                        | 291                     | 2809                | 1379                | 254                 | 0                       | More intensive (2362)               | Less intensive (2371)                | IHD or non-fatal MI, Stroke, HF, CVD death | 1.8                                             | 13.9                                            | Age ≥40y years with CVD or ≥50 years with substantial atherosclerosis, T2D, HbA1c ≥7.5%, albuminuria, LVH or ≥2 CVD risk factors (dyslipidaemia, hypertension, smoking, obesity); SBP 130-180 mmHg and taking ≤3 antihypertensive drugs, 24-hour protein excretion rate <1g                                                      | Body mass index ≥45 kg/m <sup>2</sup> , serum creatinine ≥132.6 μmol/l and other serious illness                                                                             |
| ACTIVE I <sup>4</sup>    | Placebo-controlled      | Multi-country      | 4.1                        | 457                     | 1294                | 2301                | 1858                | 224                     | ARB (3058)                          | Placebo (3076)                       | MI, Stroke, HF, CVD death                  | 1.4                                             | 2.6                                             | Atrial fibrillation, ≥1 risk factor (age ≥75 years, on antihypertensive treatment, history of stroke, TIA or non-CNS embolism, LVEF <45%, PVD, or age 55-74 years with either CAD or diabetes)                                                                                                                                   | Use of anticoagulant, peptic ulcer disease in past 6 months, history of intracerebral haemorrhage, thrombocytopenia or mitral stenosis                                       |
| ADVANCE <sup>5</sup>     | Placebo-controlled      | Multi-country      | 4.2                        | 17                      | 4510                | 5605                | 995                 | 13                      | ACEI and Diuretic (5569)            | Placebo (5571)                       | MI, Stroke, HF, CVD death                  | 2.1                                             | 5.4                                             | Age ≥55 years T2D (diagnosed aged ≥30y), ≥1 major CVD or ≥1 CVD risk factor (microvascular disease, smoking, dyslipidaemia, microalbuminuria, T2D for ≥10 years, age ≥65 years)                                                                                                                                                  | HbA1c target (≤6.5%), definite indication for long-term insulin therapy                                                                                                      |
| ALLHAT <sup>6</sup>      | Drug classes comparison | Multi-country      | 4.8                        | 0                       | 18088               | 17046               | 6451                | 833                     | Diuretic (15255)                    | ACEI, CCB and Alpha-blockers (27163) | MI or IHD, Stroke, HF, CVD death           | 0.1                                             | 2.0                                             | Age ≥55y years stage 1 or 2 hypertension plus ≥1 risk factor (MI or stroke >6 months previously, left ventricular hypertrophy, T2D, smoking, HDL <0.91 mmol/l), other atherosclerotic CVD                                                                                                                                        | Symptomatic or hospitalisation for heart failure, LVEF <35%                                                                                                                  |
| ANBP <sup>7</sup>        | Placebo-controlled      | Australia          | 3.6                        | 2289                    | 964                 | 174                 | 0                   | 0                       | Diuretic (1721)                     | Placebo (1706)                       | MI or IHD, Stroke, HF, CVD death           | 3.8                                             | 7.5                                             | Age 30-69 years with mild hypertension (DBP 95-110 mmHg and SBP <200 mmHg)                                                                                                                                                                                                                                                       | Antihypertensive treatment in past 3 months, recent angina or MI, stroke, hormone therapy, asthma, diabetes, gout, serious disease, tricyclic antidepressant use             |
| ANBP2 <sup>8</sup>       | Drug classes comparison | Australia          | 4.1                        | 0                       | 0                   | 4094                | 1979                | 10                      | Diuretic (3039)                     | ACEI (3044)                          | MI or IHD, Stroke, HF, CVD death           | 0.0                                             | 0.9                                             | Age 65-84 years, SBP ≥160 mmHg or DBP ≥90 mmHg (if SBP≥140 mmHg), no recent CVD                                                                                                                                                                                                                                                  | Serious illness, plasma creatinine >221 μmol/l, malignant hypertension, dementia                                                                                             |
| ASCOT-BPLA <sup>9</sup>  | Drug classes comparison | Multi-country      | 5.3                        | 3070                    | 8050                | 6562                | 1575                | 0                       | CCB-based (9639)                    | Beta-blocker based (9618)            | MI or IHD, Stroke, HF, CVD death           | 2.0                                             | 2.2                                             | Age 40-79 years, untreated (SBP ≥160 or DBP ≥100 mmHg) or treated hypertension (SBP ≥140 or DBP ≥90 mmHg), ≥3 CVD risk factors (documented LVH, abnormal ECG, T2D, PAD, previous stroke or TIA, male sex, age ≥55 years, microalbuminuria or proteinuria, smoking, TC:HDL ≥6, family history of premature coronary heart disease | Previous MI, current treatment for angina, recent CeVD, fasting triglycerides >4.5 mmol/l, heart failure, arrhythmia, haematological or biochemical abnormality at screening |
| BENEDICT <sup>10</sup>   | Placebo-controlled      | Italy              | 3.1                        | 211                     | 511                 | 412                 | 74                  | 1                       | ACEI, CCB and ACEI/CCB (904)        | Placebo (300)                        | MI or IHD, Stroke, HF, CVD death           | 1.3                                             | 1.3                                             | Age ≥40 years, untreated SBP ≥130 / DBP ≥85 mmHg or needing treatment to attain below these levels, T2D for <25 years, urinary albumin excretion rate <20 μg/min, serum creatinine ≤133 μmol/l                                                                                                                                   | HbA1c ≥11%, nondiabetic renal disease                                                                                                                                        |
| CAMELOT <sup>11</sup>    | Placebo-controlled      | Multi-country      | 1.6                        | 801                     | 662                 | 461                 | 73                  | 0                       | CCB and ACEI (1340)                 | Placebo (657)                        | MI, non-fatal Stroke, HF, CVD death        | 3.3                                             | 5.3                                             | Age 30-79 years, coronary artery stenosis >20% by angiography, DBP <100 mmHg                                                                                                                                                                                                                                                     | Left middle coronary artery obstruction >50%, LVEF <40%, heart failure                                                                                                       |
| CAPP <sup>12</sup>       | Drug classes comparison | Sweden and Finland | 5.8                        | 6378                    | 4033                | 574                 | 0                   | 0                       | Beta-blocker and/or Diuretic (5493) | ACEI (5492)                          | MI or IHD, Stroke, CVD death               | 1.3                                             | 2.2                                             | Age 25-66 years, DBP ≥100 mmHg on two occasions                                                                                                                                                                                                                                                                                  | Secondary hypertension, serum creatinine >150 μmol/l, condition requiring β-blocker treatment                                                                                |
| CARDIO-SIS <sup>13</sup> | Intensive               | Italy              | 4.7                        | 1                       | 463                 | 455                 | 182                 | 10                      | More intensive (558)                | Less intensive (553)                 | MI, Stroke, HF                             | 1.5                                             | 3.8                                             | Age ≥55 years, SBP ≥150 mmHg, taking antihypertensive drug ≥12 weeks, ≥1 CV risk factor (smoking, dyslipidaemia, family history of premature CVD, prior TIA or stroke, established CAD or PAD                                                                                                                                    | Fasting blood glucose ≥7 mmol/l, diabetes, serious conditions, renal disease, valvular heart disease, left ventricular hypertrophy, atrial fibrillation, substance misuse.   |
| CASE-J <sup>14</sup>     | Drug classes comparison | Japan              | 3.1                        | 937                     | 1310                | 1705                | 751                 | 0                       | CCB (2349)                          | ARB (2354)                           | MI, Stroke, HF, CVD death                  | 0.9                                             | 1.7                                             | Age 20-85 years, ≥1 high-risk factor: SBP ≥180 or DBP ≥110 mmHg, T2D, history of angina pectoris, MI, stroke, TIA >6 months prior to screening, LVH, proteinuria or serum creatinine ≥1.3 mg/100 ml, peripheral artery obstruction                                                                                               | BP ≥200/120 mmHg, T1D, heart failure, ejection fraction <40%, atrial fibrillation, cancer                                                                                    |
| COLM <sup>15</sup>       | Drug classes comparison | Japan              | 3.0                        | 0                       | 0                   | 2918                | 2223                | 0                       | ARB and Diuretic (2573)             | ARB and CCB (2568)                   | MI, Stroke, HF, CVD death                  | 0.4                                             | 0.3                                             | Age 65-84 years, hypertension (treated: BP ≥140/90 mmHg; untreated: BP ≥160/100 mmHg), CVD history or CVD risk factors (diabetes, dyslipidaemia)                                                                                                                                                                                 | Secondary/malignant hypertension, recent major CVD, revascularisation, angina pectoris                                                                                       |

|                                      |                         |                        |     |      |      |      |      |      |                                           |                                 |                                        |               |               |                                                                                                                                                                                                                                                                                                                 |                                                                                                                                                                                                                        |
|--------------------------------------|-------------------------|------------------------|-----|------|------|------|------|------|-------------------------------------------|---------------------------------|----------------------------------------|---------------|---------------|-----------------------------------------------------------------------------------------------------------------------------------------------------------------------------------------------------------------------------------------------------------------------------------------------------------------|------------------------------------------------------------------------------------------------------------------------------------------------------------------------------------------------------------------------|
|                                      |                         |                        |     |      |      |      |      |      |                                           |                                 |                                        |               |               |                                                                                                                                                                                                                                                                                                                 | hospitalisation or severe heart failure, atrial fibrillation, hepatic or renal dysfunction                                                                                                                             |
| <b>CONVINCE</b> <sup>16</sup>        | Drug classes comparison | Multi-country          | 2.8 | 0    | 7994 | 6277 | 2019 | 186  | CCB (8179)                                | Beta-blocker or Diuretic (8297) | MI or IHD, Stroke, HF, CVD death       | 0.7           | 0.0           | Age ≥55 years, hypertension, ≥1 CVD risk factor (e.g., diabetes, smoking)                                                                                                                                                                                                                                       | Heart failure, dysrhythmia, secondary hypertension, recent MI or stroke, renal disease, other serious disease, BP ≥190/110 mmHg without treatment                                                                      |
| <b>COPE</b> <sup>17</sup>            | Drug classes comparison | Japan                  | 3.6 | 741  | 1006 | 1021 | 509  | 16   | CCB/Diuretic and CCB/ Beta-blocker (2183) | CCB and ARB (1110)              | MI, Stroke, HF, CVD death              | 0.4           | 0.4           | Age 40-85 years, BP ≥140/90 mmHg                                                                                                                                                                                                                                                                                | SBP ≥200 or DBP ≥120 mmHg, secondary hypertension, diabetes, recent CVD or revascularisation, heart failure, atrial fibrillation/flutter, hepatic or renal dysfunction, congenital or rheumatic heart disease, cancer  |
| <b>DIABHYCAR</b> <sup>18</sup>       | Placebo-controlled      | Multi-country          | 3.9 | 603  | 1732 | 1929 | 577  | 71   | ACEI (2443)                               | Placebo (2469)                  | MI, Stroke, HF, CVD death              | 0.4           | 0.9           | Age ≥50 years, T2D, urinary albumin excretion ≥20 mg/l in two consecutive urine samples                                                                                                                                                                                                                         | Serum creatinine >150 μmol/l, use of insulin, ACEI or ARB, heart failure, recent MI, urinary tract infection                                                                                                           |
| <b>Dutch TIA Trial</b> <sup>19</sup> | Placebo-controlled      | The Netherlands        | 2.3 | 271  | 438  | 549  | 206  | 9    | Beta-blocker (732)                        | Placebo (741)                   | non-fatal MI or IHD, Stroke, CVD death | 2.0           | 3.1           | TIA or non-disabling ischaemic stroke (Rankin Scale ≤3) in past 3 months                                                                                                                                                                                                                                        | Cerebral ischaemia from identifiable causes other than arterial thrombosis or embolism                                                                                                                                 |
| <b>E-COST</b> <sup>20</sup>          | Drug classes comparison | Japan                  | 3.1 | 433  | 603  | 620  | 301  | 52   | ARB (1053)                                | Conventional (995)              | Not available                          | Not available | Not available | Age 35-79 years, BP 140-180/90-110 mmHg                                                                                                                                                                                                                                                                         | Diabetes, dysglycemia, secondary hypertension, recent MI or stroke, angina pectoris requiring β-blocker treatment, heart failure, left ventricular ejection fraction <40%                                              |
| <b>ELSA</b> <sup>21</sup>            | Drug classes comparison | Multi-country          | 3.4 | 1062 | 911  | 353  | 8    | 0    | CCB (1177)                                | Beta-blocker (1157)             | MI or IHD, Stroke, HF, CVD death       | 0.4           | 0.8           | Age 45-79 years, BP 150-210/95-115 mmHg                                                                                                                                                                                                                                                                         | Recent MI or stroke, and T2D                                                                                                                                                                                           |
| <b>EUROPA</b> <sup>22</sup>          | Placebo-controlled      | Multi-country (Europe) | 4.2 | 3550 | 4284 | 3785 | 590  | 9    | ACEI (6110)                               | Placebo (6108)                  | MI, Stroke, HF                         | 2.2           | 4.6           | Age ≥18 years, documented MI >3 months before screening, revascularisation >6 months before screening, >70% coronary obstruction                                                                                                                                                                                | Heart failure, hypotension, uncontrolled hypertension, renal insufficiency, serum potassium >5.5 mmol/L                                                                                                                |
| <b>EWPHE</b> <sup>23</sup>           | Placebo-controlled      | Multi-country          | 4.6 | 0    | 169  | 387  | 216  | 68   | Diuretic (416)                            | Placebo (424)                   | MI, Stroke, HF, CVD death              | 9.5           | 22.4          | Age ≥60 years, BP 160-239/90-119 mmHg                                                                                                                                                                                                                                                                           | Curable causes of high BP, retinopathy, heart failure, stroke history, hepatitis/cirrhosis, gout, malignancy, diabetes requiring insulin treatment                                                                     |
| <b>HDFP</b> <sup>24</sup>            | Intensive               | USA                    | 7.2 | 6844 | 3100 | 996  | 0    | 0    | More intensive (5553)                     | Less intensive (5387)           | MI, Stroke, HF, CVD death              | 4.9           | 9.9           | Ages 30-69 years, hypertension, DBP home readings and clinic readings ≥ 95 mmHg and 90 mm Hg, respectively                                                                                                                                                                                                      | age outside the range of 30 to 69 years, terminal disease, and illness resulting in confinement to bed.                                                                                                                |
| <b>HIJ-CREATE</b> <sup>25</sup>      | Drug classes comparison | Japan                  | 4.0 | 311  | 583  | 867  | 288  | 0    | ARB (1024)                                | non-ARB (1025)                  | MI, Stroke, HF, CVD death              | 0.5           | 0.4           | Age 20-80 years, CAD hospitalisation and hypertension (BP ≥140/90 mmHg or antihypertensive treatment use)                                                                                                                                                                                                       | Secondary hypertension, recent AMI or CeVD, severe aortic valve stenosis, cardiomyopathy, serum creatinine >2 mg/dl, serum potassium >5 mmol/l, hepatic dysfunction, malignancy                                        |
| <b>HOMED-BP</b> <sup>26</sup>        | Intensive               | Japan                  | 4.9 | 0    | 3518 | 0    | 0    | 0    | More intensive (1759)                     | Less intensive (1759)           | MI, Stroke, HF, CVD death              | 0.9           | 2.0           | Self-measured SBP 135-179 mmHg or DBP 85-119 mmHg, but not if DBP <65 or SBP <110 mmHg (clinic SBP <220 mmHg and DBP <125 mmHg)                                                                                                                                                                                 | None specified                                                                                                                                                                                                         |
| <b>HOPE</b> <sup>27</sup>            | Placebo-controlled      | Multi-country          | 4.5 | 8    | 4147 | 4128 | 983  | 30   | ACEI (4645)                               | Placebo (4652)                  | MI, Stroke                             | 1.4           | 3.0           | Age ≥55 years, CAD, stroke, PVD or diabetes, plus ≥1 risk factor (hypertension, dyslipidaemia, smoking, or documented microalbuminuria)                                                                                                                                                                         | Heart failure, left ejection fraction <40%, using ACEI or Vitamin E, uncontrolled hypertension, nephropathy, or recent MI or stroke                                                                                    |
| <b>HYVET</b> <sup>28</sup>           | Placebo-controlled      | Multi-country          | 2.1 | 0    | 0    | 0    | 2794 | 1049 | Diuretic (1933)                           | Placebo (1912)                  | MI, Stroke, HF, CVD death              | 5.1           | 13.1          | Age ≥80y years, sustained SBP ≥160 mmHg                                                                                                                                                                                                                                                                         | Accelerated or secondary hypertension, recent haemorrhagic stroke, heart failure, serum creatinine >150 μmol/L, serum potassium <3.5 or >5.5 mmol/L, gout, and dementia                                                |
| <b>IDNT</b> <sup>29</sup>            | Placebo-controlled      | USA                    | 2.6 | 442  | 805  | 462  | 2    | 0    | ARB and CCB (1146)                        | Placebo (569)                   | Total mortality                        | 2.8           | 2.8           | Age 30-70 years, T2D, hypertension (BP ≥135/85 mmHg or taking anti-hypertensive drug), proteinuria, serum creatinine (μmol/l): 88 to 265 (women) or 106 to 265 (men)                                                                                                                                            | None specified                                                                                                                                                                                                         |
| <b>INSIGHT</b> <sup>30</sup>         | Drug classes comparison | Multi-country          | 2.8 | 49   | 3002 | 2685 | 585  | 0    | Diuretic (3164)                           | CCB (3157)                      | MI, Stroke, fatal HF, CVD death        | 0.9           | 1.1           | Age 55-80 years, hypertensive (SBP ≥150 or DBP ≥95 mmHg, or SBP ≥160 mmHg), ≥1 other risk factor (TC ≥6.43 mmol/l, smoking, family history of premature MI, CAD, other CVD)                                                                                                                                     | None specified                                                                                                                                                                                                         |
| <b>INVEST</b> <sup>31</sup>          | Drug classes comparison | Multi-country          | 2.8 | 3004 | 6806 | 7036 | 3779 | 695  | CCB (10648)                               | non-CCB (10672)                 | MI or IHD, Stroke, HF, CVD death       | 0.2           | 0.1           | Age ≥50 years, documented CAD, essential hypertension requiring drug therapy, heart failure Class I-III <sup>p</sup>                                                                                                                                                                                            | Patients taking β-blocker within two weeks of randomization or for recent MI                                                                                                                                           |
| <b>JMIC-B</b> <sup>32</sup>          | Drug classes comparison | Japan                  | 2.3 | 224  | 525  | 746  | 150  | 3    | CCB (828)                                 | ACEI (822)                      | MI or IHD, Stroke, HF, CVD death       | 1.5           | 2.0           | Age <75 years, hypertension (BP ≥160/≥95 mmHg or both SBP ≥150 and DBP ≥90 mmHg, or antihypertensive treatment), CAD or meeting both criteria: history of >2 anginal attacks per week with stable frequency and ST-segment depression of ≥1 mm on stress test (or detection of MI with myocardial scintigraphy) | MI, unstable angina, DBP ≥120 mmHg, secondary hypertension, symptomatic CeVD, heart failure, atrial fibrillation/arrhythmias, renal or hepatic dysfunction, uncontrollable diabetes and familial hypercholesterolaemia |
| <b>LIFE</b> <sup>33</sup>            | Drug classes comparison | Multi-country          | 4.9 | 83   | 3350 | 4098 | 1662 | 0    | ARB (4605)                                | Beta-blocker (4588)             | MI or IHD, Stroke, HF, CVD death       | 0.5           | 1.2           | Age 55-80 years, hypertension (SBP 160-200 mmHg; DBP 95-115 mmHg), electrocardiogram signs of LVH                                                                                                                                                                                                               | Secondary hypertension, recent MI or stroke, angina pectoris requiring treatment, heart failure or left ejection fraction ≤40%                                                                                         |
| <b>MOSES</b> <sup>34</sup>           | Drug classes comparison | Germany and Austria    | 3.3 | 137  | 322  | 511  | 359  | 23   | CCB (671)                                 | ARB (681)                       | MI or IHD, Stroke, HF, CVD death       | 0.5           | 1.5           | Hypertension requiring treatment, documented TIA, ischaemic stroke or cerebral haemorrhage                                                                                                                                                                                                                      | Internal carotid artery occlusion or stenosis >70%, heart failure, age >85 years, on anticoagulant for cardiac arrhythmia, high-grade aortic or mitral valve stenosis, unstable angina                                 |

|                                          |                         |                                                    |     |      |       |       |      |     |                                     |                       |                                               |     |      |                                                                                                                                                                                                                                                                                                                      |                                                                                                                                                                                                                                                                                                                                                                              |
|------------------------------------------|-------------------------|----------------------------------------------------|-----|------|-------|-------|------|-----|-------------------------------------|-----------------------|-----------------------------------------------|-----|------|----------------------------------------------------------------------------------------------------------------------------------------------------------------------------------------------------------------------------------------------------------------------------------------------------------------------|------------------------------------------------------------------------------------------------------------------------------------------------------------------------------------------------------------------------------------------------------------------------------------------------------------------------------------------------------------------------------|
| <b>NICS-EH</b> <sup>35</sup>             | Drug classes comparison | Japan                                              | 3.2 | 2    | 104   | 212   | 92   | 7   | Diuretic (214)                      | CCB (215)             | MI or IHD, Stroke, HF, CVD death              | 0.7 | 0.3  | Age ≥60 years, SBP 160-220 mmHg and DBP <115 mmHg and no cardiovascular complications                                                                                                                                                                                                                                | None specified                                                                                                                                                                                                                                                                                                                                                               |
| <b>NORDIL</b> <sup>36</sup>              | Drug classes comparison | Norway and Sweden                                  | 4.2 | 2833 | 4973  | 3062  | 3    | 0   | Beta-blocker and/or Diuretic (5471) | CCB (5410)            | MI or IHD, Stroke, CVD death                  | 0.1 | 3.3  | Age 50-74 years, untreated hypertension (DBP ≥100 mmHg on two occasions); if previously treated, DBP ≥100 mmHg on two consecutive visits at one week apart during run-in period and no treatment was given                                                                                                           | Age <50 or ≥70y, bradycardia, secondary hypertension, atrial fibrillation, recent CeVD or MI, heart failure                                                                                                                                                                                                                                                                  |
| <b>ONTARGET</b> <sup>37</sup>            | Drug classes comparison | Multi-country                                      | 4.8 | 3    | 10822 | 10926 | 3684 | 185 | ARB/ACEI (8502)                     | ACEI and ARB (17118)  | MI or IHD, Stroke, HF, CVD death              | 1.0 | 1.9  | CAD, PAD, CeVD or diabetes with end-organ damage                                                                                                                                                                                                                                                                     | Heart failure, pericarditis, congenital heart disease, unexplained syncope, planned revascularisation <3 months of consent, uncontrolled hypertension, heart transplant, subarachnoid haemorrhage, renal artery disease, proteinuria, hepatic dysfunction, volume or sodium depletion, primary hyperaldosteronism, hereditary fructose intolerance, other serious conditions |
| <b>PART 2</b> <sup>38</sup>              | Placebo-controlled      | New Zealand                                        | 4.6 | 141  | 249   | 222   | 5    | 0   | ACEI (308)                          | Placebo (309)         | MI or IHD, Stroke, HF, CVD death              | 3.6 | 6.5  | Age ≤75 years, diagnosis (in past 5 year) of MI, documented CAD, TIA or intermittent claudication                                                                                                                                                                                                                    | Heart failure, serious nonvascular disease, SBP >160 mmHg, DBP >100 mmHg, DBP <100 mmHg during pre-randomization run-in period                                                                                                                                                                                                                                               |
| <b>PEACE</b> <sup>39</sup>               | Placebo-controlled      | Multi-country (USA, Puerto Rico, Canada and Italy) | 4.7 | 1162 | 3042  | 3056  | 1030 | 0   | ACEI (4158)                         | Placebo (4132)        | non-fatal MI, non-fatal stroke, HF, CVD death | 1.5 | 3.0  | Age ≥50 years, documented CAD                                                                                                                                                                                                                                                                                        | Unstable angina, severe valvular heart disease, recent revascularisation, planned elective revascularisation, limited 5-year survival, serum creatinine >177 μmol/l, serum potassium >5.5 mmol/l                                                                                                                                                                             |
| <b>PREVEND IT</b> <sup>40</sup>          | Placebo-controlled      | The Netherlands                                    | 3.8 | 542  | 179   | 128   | 15   | 0   | ACEI (431)                          | Placebo (433)         | MI, Stroke, HF, CVD death                     | 2.8 | 5.6  | Microalbuminuria, SBP <160/100 mmHg (no previous antihypertension treatment)                                                                                                                                                                                                                                         | Creatinine clearance <60% of normal age-adjusted value                                                                                                                                                                                                                                                                                                                       |
| <b>PREVENT</b> <sup>41</sup>             | Placebo-controlled      | USA and Canada                                     | 3.0 | 339  | 262   | 207   | 17   | 0   | CCB (417)                           | Placebo (408)         | MI, Stroke, HF, CVD death                     | 3.3 | 6.1  | Age 30-80 years, documented CAD, DBP <95 mmHg, cholesterol <325 mg/dl, fasting blood glucose <200 mg/dl                                                                                                                                                                                                              | Contraindication for dihydropyridines, uncontrolled hypertension, diabetes and other major illness                                                                                                                                                                                                                                                                           |
| <b>PROFESS</b> <sup>42</sup>             | Placebo-controlled      | Multi-country                                      | 2.5 | 1369 | 7560  | 7191  | 3359 | 282 | ARB (9873)                          | Placebo (9925)        | MI or IHD, Stroke, HF, CVD death              | 3.4 | 3.4  | Age ≥55 years with ischaemic stroke <90 days before randomization (later modified to include age 50 to 54 years or had stroke 90 to 120 days before randomisation if with ≥2 additional risk factors: diabetes, hypertension, smoker, obesity previous CVD, end-organ damage or hyperlipidaemia) and remained stable | Haemorrhagic stroke, severe disability after the qualifying stroke, contraindication to treatments                                                                                                                                                                                                                                                                           |
| <b>PROGRESS</b> <sup>43</sup>            | Placebo-controlled      | Multi-country (Asia, Australasia, Europe)          | 3.9 | 1026 | 2005  | 2260  | 767  | 47  | ACEI and/or Diuretic (3051)         | Placebo (3054)        | MI or IHD, Stroke, HF, CVD death              | 4.0 | 9.2  | Stroke or TIA in past 5 years                                                                                                                                                                                                                                                                                        | Indication or contraindication for ACEI                                                                                                                                                                                                                                                                                                                                      |
| <b>SHEP</b> <sup>44</sup>                | Placebo-controlled      | USA                                                | 5.0 | 0    | 757   | 2423  | 1390 | 166 | Beta-blocker and Diuretic (2365)    | Placebo (2371)        | non-fatal MI, non-fatal Stroke, CVD death     | 4.2 | 12.8 | Age ≥60 years, isolated systolic hypertension (BP 160-219/<90 mmHg, not on treatment)                                                                                                                                                                                                                                | Major CVD, cancer, alcoholic liver disease, renal dysfunction, competing risk of SHEP primary endpoint or presence of medical management exclusions                                                                                                                                                                                                                          |
| <b>SPRINT</b> <sup>45</sup>              | Intensive               | USA and Puerto Rico                                | 3.0 | 609  | 3196  | 2904  | 2258 | 394 | More intensive (4678)               | Less intensive (4683) | MI or IHD, Stroke, HF, CVD death              | 7.7 | 14.9 | Age ≥50y years, SBP 130-180 mmHg, increased CVD risk (clinical/subclinical CVD other than stroke, CKD excluding polycystic kidney disease and with eGFR of 20-60 ml/min/1.73m <sup>2</sup> body surface area, 10-year Framingham CVD risk ≥15%, age ≥75y)                                                            | Diabetes or prior stroke                                                                                                                                                                                                                                                                                                                                                     |
| <b>STOP Hypertension-2</b> <sup>46</sup> | Drug classes comparison | Sweden                                             | 4.5 | 0    | 0     | 2696  | 3856 | 62  | Beta-blocker and/or Diuretic (2213) | ACEI and CCB (4401)   | MI or IHD, Stroke, HF, CVD death              | 0.3 | 2.1  | Aged 70-84 years, SBP ≥180 mmHg and/or DBP ≥105 mmHg                                                                                                                                                                                                                                                                 | Not specified                                                                                                                                                                                                                                                                                                                                                                |
| <b>SYST-EUR</b> <sup>47</sup>            | Placebo-controlled      | Multi-country                                      | 2.6 | 0    | 1124  | 2554  | 880  | 137 | CCB (2398)                          | Placebo (2297)        | MI or IHD, Stroke, HF, CVD death              | 4.0 | 10.1 | Age ≥60 years, sitting SBP 160-219 mmHg, sitting DBP <95 mmHg, and standing SBP ≥140 mmHg                                                                                                                                                                                                                            | Secondary hypertension, retinal haemorrhage/papilloedema, heart failure, dissecting aortic aneurysm, serum creatinine ≥180 μmol/l, recent severe nosebleeds, stroke or MI, dementia, disorders prohibiting standing position, severe CVD/non-CVD                                                                                                                             |
| <b>TRANSCEND</b> <sup>48</sup>           | Placebo-controlled      | Multi-country                                      | 4.9 | 2    | 2349  | 2580  | 945  | 50  | ARB (2954)                          | Placebo (2972)        | MI or IHD, Stroke, HF, CVD death              | 2.2 | 4.5  | Intolerant to ACEI and with established CAD, PVD, CeVD or diabetes with end-organ damage                                                                                                                                                                                                                             | Heart failure, valvular/cardiac outflow tract obstruction, pericarditis, congenital heart disease, unexplained syncope, recent revascularisation, SBP >160 mmHg, heart transplantation, subarachnoid haemorrhage, significant renal stenosis, renal or hepatic dysfunction                                                                                                   |
| <b>UKPDS</b> <sup>49</sup>               | Intensive               | UK                                                 | 7.9 | 437  | 513   | 198   | 0    | 0   | More intensive (758)                | Less intensive (390)  | MI or IHD, Stroke                             | 1.2 | 11.2 | Age 25-65 years, newly diagnosed diabetes, and hypertension (untreated: SBP ≥160 mmHg and/or DBP ≥90 mmHg; treated: SBP ≥150 mmHg and/or DBP ≥85 mmHg)                                                                                                                                                               | Ketonuria, recent MI, angina, heart failure, >1 major vascular episode, serum creatinine >15 μmol/l, retinopathy, malignant hypertension, uncorrected endocrine abnormality, severe concurrent illness                                                                                                                                                                       |
| <b>VALISH</b> <sup>50</sup>              | Intensive               | Japan                                              | 2.6 | 0    | 0     | 1233  | 1846 | 0   | More intensive (1545)               | Less intensive (1534) | MI, Stroke, HF, CVD death                     | 1.8 | 5.0  | Age ≥70 to <85 years, isolated hypertension (SBP >160 mmHg and DBP <90 mmHg)                                                                                                                                                                                                                                         | Secondary or malignant hypertension, BP ≥200/≥90 mmHg, recent CeVD or MI, recent/planned revascularisation, heart failure,                                                                                                                                                                                                                                                   |

|                                                                                                                                                                                                                                                                    |                         |               |     |      |      |      |      |     |                  |                  |                                  |     |     |                                                                                                                                                                                 |                                                                                                                                                                                                                     |
|--------------------------------------------------------------------------------------------------------------------------------------------------------------------------------------------------------------------------------------------------------------------|-------------------------|---------------|-----|------|------|------|------|-----|------------------|------------------|----------------------------------|-----|-----|---------------------------------------------------------------------------------------------------------------------------------------------------------------------------------|---------------------------------------------------------------------------------------------------------------------------------------------------------------------------------------------------------------------|
|                                                                                                                                                                                                                                                                    |                         |               |     |      |      |      |      |     |                  |                  |                                  |     |     |                                                                                                                                                                                 | aortic stenosis, valvular heart disease, atrial fibrillation/flutter, serious arrhythmia, renal/liver dysfunction                                                                                                   |
| <b>VALUE<sup>51</sup></b>                                                                                                                                                                                                                                          | Drug classes comparison | Multi-country | 4.2 | 1160 | 4519 | 6633 | 2725 | 208 | CCB-based (7596) | ARB-based (7649) | MI, Stroke, HF, CVD death        | 1.3 | 1.6 | Age ≥50 years, hypertension, CVD, CVD risk factors (male sex, age >50 years, diabetes, current smoking, high cholesterol, LVH, proteinuria, serum creatinine 150 to 265 μmol/l) | Renal artery stenosis, recent CAD or CeVD, severe hepatic disease or chronic renal failure, heart failure, on monotherapy with β-blocker for CAD and hypertension                                                   |
| <b>VHAS<sup>52</sup></b>                                                                                                                                                                                                                                           | Drug classes comparison | Italy         | 1.7 | 693  | 676  | 45   | 0    | 0   | Diuretic (707)   | CCB (707)        | MI or IHD, Stroke, HF, CVD death | 1.3 | 1.7 | Age 40-65 years, BP ≥160/95 mmHg                                                                                                                                                | Secondary hypertension, recent stroke or TIA, CAD, PAD, bradycardia, arrhythmias, heart failure, renal or hepatic dysfunction, hyperuricaemia, hypokalemia, T1D, familial dyslipidemia, serious concomitant disease |
| CVD: Cardiovascular disease; MI: myocardial infraction; IHD: ischaemic heart disease; HF: heart failure; SD: Standard deviation; ACEI, angiotensin-converting enzyme inhibitor; ARB, angiotensin receptor blocker; BB, beta-blocker; CCB, calcium channel blocker. |                         |               |     |      |      |      |      |     |                  |                  |                                  |     |     |                                                                                                                                                                                 |                                                                                                                                                                                                                     |

Table S3. Unstandardised effects of systolic blood pressure-lowering treatment on primary and secondary outcomes, stratified by age categories and trial design.

|                                            | Placebo-controlled trials |       |            |       | Hazard ratio (95% CI)                      | Blood pressure-lowering intensity trials |       |            |       | Hazard ratio (95% CI)                      | Drug class comparison trials |       |            |       | Hazard ratio (95% CI) |
|--------------------------------------------|---------------------------|-------|------------|-------|--------------------------------------------|------------------------------------------|-------|------------|-------|--------------------------------------------|------------------------------|-------|------------|-------|-----------------------|
|                                            | Intervention              |       | Comparator |       |                                            | Intervention                             |       | Comparator |       |                                            | Intervention                 |       | Comparator |       |                       |
|                                            | Events                    | Total | Events     | Total |                                            | Events                                   | Total | Events     | Total |                                            | Events                       | Total | Events     | Total |                       |
| <b>Major cardiovascular events</b>         |                           |       |            |       |                                            |                                          |       |            |       |                                            |                              |       |            |       |                       |
| <55 years                                  | 399                       | 6572  | 502        | 6182  | 0.76 (0.67 to 0.87)                        | 671                                      | 4641  | 739        | 4365  | 0.84 (0.76 to 0.93)                        | 415                          | 10374 | 501        | 10177 | 0.83 (0.72 to 0.94)   |
| 55-64 years                                | 1798                      | 18164 | 2084       | 17914 | 0.86 (0.81 to 0.91)                        | 830                                      | 7205  | 872        | 7013  | 0.88 (0.80 to 0.97)                        | 3008                         | 34261 | 4124       | 42575 | 0.98 (0.93 to 1.02)   |
| 65-74 years                                | 2704                      | 20429 | 2942       | 19716 | 0.91 (0.86 to 0.95)                        | 465                                      | 3809  | 485        | 3725  | 0.92 (0.81 to 1.05)                        | 4244                         | 35294 | 6124       | 44446 | 0.95 (0.91 to 0.98)   |
| 75-84 years                                | 1411                      | 8281  | 1644       | 8400  | 0.89 (0.83 to 0.95)                        | 132                                      | 2243  | 174        | 2231  | 0.78 (0.62 to 0.98)                        | 2282                         | 14197 | 3356       | 18297 | 0.98 (0.93 to 1.03)   |
| ≥85 years                                  | 227                       | 1104  | 219        | 1039  | 1.07 (0.89 to 1.29)                        | 23                                       | 190   | 35         | 210   | 0.76 (0.45 to 1.28)                        | 209                          | 948   | 328        | 1277  | 0.93 (0.78 to 1.11)   |
| <i>Adjusted P for interaction = 0.15</i>   |                           |       |            |       | <i>Adjusted P for interaction = 1</i>      |                                          |       |            |       | <i>Adjusted P for interaction = 0.70</i>   |                              |       |            |       |                       |
| <i>Unadjusted P for interaction = 0.03</i> |                           |       |            |       | <i>Unadjusted P for interaction = 0.66</i> |                                          |       |            |       | <i>Unadjusted P for interaction = 0.14</i> |                              |       |            |       |                       |
| <b>Stroke</b>                              |                           |       |            |       |                                            |                                          |       |            |       |                                            |                              |       |            |       |                       |
| <55 years                                  | 112                       | 6571  | 165        | 6178  | 0.66 (0.52 to 0.83)                        | 229                                      | 4643  | 294        | 4366  | 0.72 (0.61 to 0.87)                        | 135                          | 10376 | 181        | 10177 | 0.73 (0.59 to 0.92)   |
| 55-64 years                                | 664                       | 18187 | 806        | 17939 | 0.82 (0.74 to 0.91)                        | 253                                      | 7209  | 297        | 7011  | 0.80 (0.68 to 0.95)                        | 846                          | 34281 | 1097       | 42583 | 0.97 (0.88 to 1.16)   |
| 65-74 years                                | 1077                      | 20461 | 1223       | 19753 | 0.89 (0.82 to 0.97)                        | 146                                      | 3805  | 153        | 3722  | 0.90 (0.71 to 1.12)                        | 1361                         | 35328 | 1937       | 44478 | 0.92 (0.85 to 0.98)   |
| 75-84 years                                | 602                       | 8291  | 693        | 8393  | 0.90 (0.81 to 1.00)                        | 39                                       | 2241  | 47         | 2229  | 0.84 (0.55 to 1.28)                        | 864                          | 14221 | 1214       | 18335 | 0.99 (0.91 to 1.08)   |
| ≥85 years                                  | 86                        | 1101  | 91         | 1037  | 1.07 (0.79 to 1.43)                        | 6                                        | 190   | 10         | 210   | 0.66 (0.24 to 1.81)                        | 47                           | 948   | 94         | 1277  | 0.72 (0.51 to 1.03)   |
| <i>Adjusted P for interaction = 0.25</i>   |                           |       |            |       | <i>Adjusted P for interaction = 1</i>      |                                          |       |            |       | <i>Adjusted P for interaction = 0.30</i>   |                              |       |            |       |                       |
| <i>Unadjusted P for interaction = 0.05</i> |                           |       |            |       | <i>Unadjusted P for interaction = 0.68</i> |                                          |       |            |       | <i>Unadjusted P for interaction = 0.06</i> |                              |       |            |       |                       |
| <b>Ischaemic heart disease</b>             |                           |       |            |       |                                            |                                          |       |            |       |                                            |                              |       |            |       |                       |
| <55 years                                  | 226                       | 6574  | 272        | 6180  | 0.80 (0.67 to 0.95)                        | 440                                      | 4643  | 441        | 4365  | 0.93 (0.81 to 1.06)                        | 249                          | 10374 | 292        | 10177 | 0.86 (0.72 to 1.01)   |
| 55-64 years                                | 647                       | 18164 | 788        | 17909 | 0.83 (0.74 to 0.92)                        | 551                                      | 7206  | 554        | 7008  | 0.92 (0.82 to 1.04)                        | 1888                         | 34279 | 2567       | 42582 | 1.01 (0.96 to 1.08)   |
| 65-74 years                                | 865                       | 20414 | 973        | 19707 | 0.86 (0.79 to 0.95)                        | 292                                      | 3810  | 295        | 3724  | 0.95 (0.81 to 1.12)                        | 2382                         | 35321 | 3492       | 44471 | 0.97 (0.92 to 1.02)   |
| 75-84 years                                | 358                       | 8276  | 423        | 8394  | 0.89 (0.77 to 1.02)                        | 67                                       | 2243  | 81         | 2231  | 0.87 (0.63 to 1.20)                        | 1020                         | 14219 | 1611       | 18324 | 0.95 (0.88 to 1.03)   |
| ≥85 years                                  | 37                        | 1102  | 34         | 1038  | 1.18 (0.74 to 1.88)                        | 8                                        | 190   | 10         | 210   | 1.00 (0.39 to 2.53)                        | 94                           | 948   | 146        | 1276  | 0.98 (0.76 to 1.27)   |
| <i>Adjusted P for interaction = 1</i>      |                           |       |            |       | <i>Adjusted P for interaction = 1</i>      |                                          |       |            |       | <i>Adjusted P for interaction = 1</i>      |                              |       |            |       |                       |
| <i>Unadjusted P for interaction = 0.54</i> |                           |       |            |       | <i>Unadjusted P for interaction = 0.98</i> |                                          |       |            |       | <i>Unadjusted P for interaction = 0.34</i> |                              |       |            |       |                       |
| <b>Heart failure</b>                       |                           |       |            |       |                                            |                                          |       |            |       |                                            |                              |       |            |       |                       |
| <55 years                                  | 37                        | 6434  | 48         | 6039  | 0.74 (0.48 to 1.14)                        | 36                                       | 4352  | 35         | 4224  | 1.01 (0.63 to 1.60)                        | 31                           | 5832  | 35         | 5592  | 0.93 (0.57 to 1.51)   |
| 55-64 years                                | 248                       | 15578 | 261        | 15236 | 0.95 (0.80 to 1.13)                        | 90                                       | 6875  | 93         | 6827  | 0.98 (0.74 to 1.31)                        | 453                          | 29732 | 757        | 38121 | 0.88 (0.78 to 0.98)   |
| 65-74 years                                | 463                       | 16873 | 511        | 16281 | 0.89 (0.78 to 1.00)                        | 66                                       | 3676  | 91         | 3654  | 0.74 (0.54 to 1.01)                        | 842                          | 33448 | 1369       | 42639 | 0.88 (0.81 to 0.96)   |
| 75-84 years                                | 303                       | 7033  | 389        | 7102  | 0.78 (0.67 to 0.91)                        | 34                                       | 2241  | 55         | 2229  | 0.65 (0.42 to 1.00)                        | 555                          | 14182 | 822        | 18274 | 0.97 (0.87 to 1.08)   |
| ≥85 years                                  | 48                        | 1002  | 44         | 940   | 1.00 (0.67 to 1.52)                        | 15                                       | 190   | 12         | 210   | 1.44 (0.67 to 3.07)                        | 66                           | 948   | 100        | 1276  | 0.98 (0.72 to 1.33)   |
| <i>Adjusted P for interaction = 1</i>      |                           |       |            |       | <i>Adjusted P for interaction = 1</i>      |                                          |       |            |       | <i>Adjusted P for interaction = 1</i>      |                              |       |            |       |                       |
| <i>Unadjusted P for interaction = 0.41</i> |                           |       |            |       | <i>Unadjusted P for interaction = 0.23</i> |                                          |       |            |       | <i>Unadjusted P for interaction = 0.64</i> |                              |       |            |       |                       |
| <b>Cardiovascular death</b>                |                           |       |            |       |                                            |                                          |       |            |       |                                            |                              |       |            |       |                       |
| <55 years                                  | 52                        | 4788  | 50         | 4411  | 1.00 (0.68 to 1.48)                        | 142                                      | 4354  | 177        | 4230  | 0.77 (0.61 to 0.96)                        | 94                           | 10376 | 105        | 10177 | 0.90 (0.68 to 1.18)   |
| 55-64 years                                | 338                       | 14052 | 355        | 13680 | 0.96 (0.83 to 1.12)                        | 207                                      | 6647  | 240        | 6616  | 0.85 (0.70 to 1.02)                        | 634                          | 34287 | 823        | 42593 | 1.00 (0.91 to 1.12)   |
| 65-74 years                                | 716                       | 16430 | 707        | 15909 | 1.01 (0.91 to 1.12)                        | 137                                      | 3469  | 137        | 3436  | 0.97 (0.77 to 1.23)                        | 1172                         | 35337 | 1619       | 44490 | 0.99 (0.92 to 1.07)   |
| 75-84 years                                | 558                       | 7553  | 645        | 7588  | 0.90 (0.80 to 1.00)                        | 23                                       | 2155  | 30         | 2145  | 0.80 (0.46 to 1.38)                        | 851                          | 14224 | 1322       | 18336 | 0.95 (0.87 to 1.04)   |
| ≥85 years                                  | 139                       | 1089  | 130        | 1019  | 1.15 (0.90 to 1.46)                        | 9                                        | 183   | 14         | 207   | 0.76 (0.33 to 1.76)                        | 128                          | 948   | 184        | 1277  | 1.00 (0.80 to 1.26)   |
| <i>Adjusted P for interaction = 1</i>      |                           |       |            |       | <i>Adjusted P for interaction = 1</i>      |                                          |       |            |       | <i>Adjusted P for interaction = 1</i>      |                              |       |            |       |                       |
| <i>Unadjusted P for interaction = 0.35</i> |                           |       |            |       | <i>Unadjusted P for interaction = 0.70</i> |                                          |       |            |       | <i>Unadjusted P for interaction = 0.86</i> |                              |       |            |       |                       |
| <b>All-cause mortality</b>                 |                           |       |            |       |                                            |                                          |       |            |       |                                            |                              |       |            |       |                       |
| <55                                        | 174                       | 6848  | 182        | 6342  | 0.89 (0.73 to 1.10)                        | 327                                      | 4651  | 396        | 4377  | 0.76 (0.66 to 0.88)                        | 234                          | 10378 | 245        | 10178 | 0.95 (0.80 to 1.14)   |
| 55-64                                      | 1047                      | 18758 | 1065       | 18204 | 0.95 (0.87 to 1.03)                        | 505                                      | 7214  | 536        | 7018  | 0.87 (0.77 to 0.98)                        | 1756                         | 34291 | 2299       | 42598 | 1.01 (0.95 to 1.07)   |
| 65-74                                      | 1927                      | 20791 | 1969       | 19933 | 0.94 (0.89 to 1.00)                        | 327                                      | 3812  | 313        | 3729  | 0.97 (0.83 to 1.36)                        | 3194                         | 35340 | 4330       | 44489 | 1.00 (0.96 to 1.05)   |
| 75-84                                      | 1380                      | 8310  | 1486       | 8414  | 0.97 (0.90 to 1.05)                        | 94                                       | 2248  | 106        | 2235  | 0.91 (0.69 to 1.20)                        | 2306                         | 14232 | 3062       | 18336 | 1.07 (1.01 to 1.13)   |
| ≥85                                        | 293                       | 1110  | 277        | 1039  | 1.09 (0.93 to 1.29)                        | 26                                       | 190   | 43         | 210   | 0.72 (0.44 to 1.17)                        | 317                          | 948   | 453        | 1277  | 0.97 (0.84 to 1.12)   |
| <i>Adjusted P for interaction = 1.00</i>   |                           |       |            |       | <i>Adjusted P for interaction = 1</i>      |                                          |       |            |       | <i>Adjusted P for interaction = 1</i>      |                              |       |            |       |                       |
| <i>Unadjusted P for interaction = 0.49</i> |                           |       |            |       | <i>Unadjusted P for interaction = 0.21</i> |                                          |       |            |       | <i>Unadjusted P for interaction = 0.35</i> |                              |       |            |       |                       |



Figure S1. Effects of diastolic blood pressure-lowering treatment on primary and secondary outcomes, stratified by age categories.

Forest plot shows the hazard ratios (HR) and 95% confidence intervals (CI) per 3 mmHg reduction in systolic and diastolic blood pressure respectively. Adjusted p interaction: adjusted for multiple testing using Hommel's method. Unadjusted p interaction: unadjusted for multiple testing.

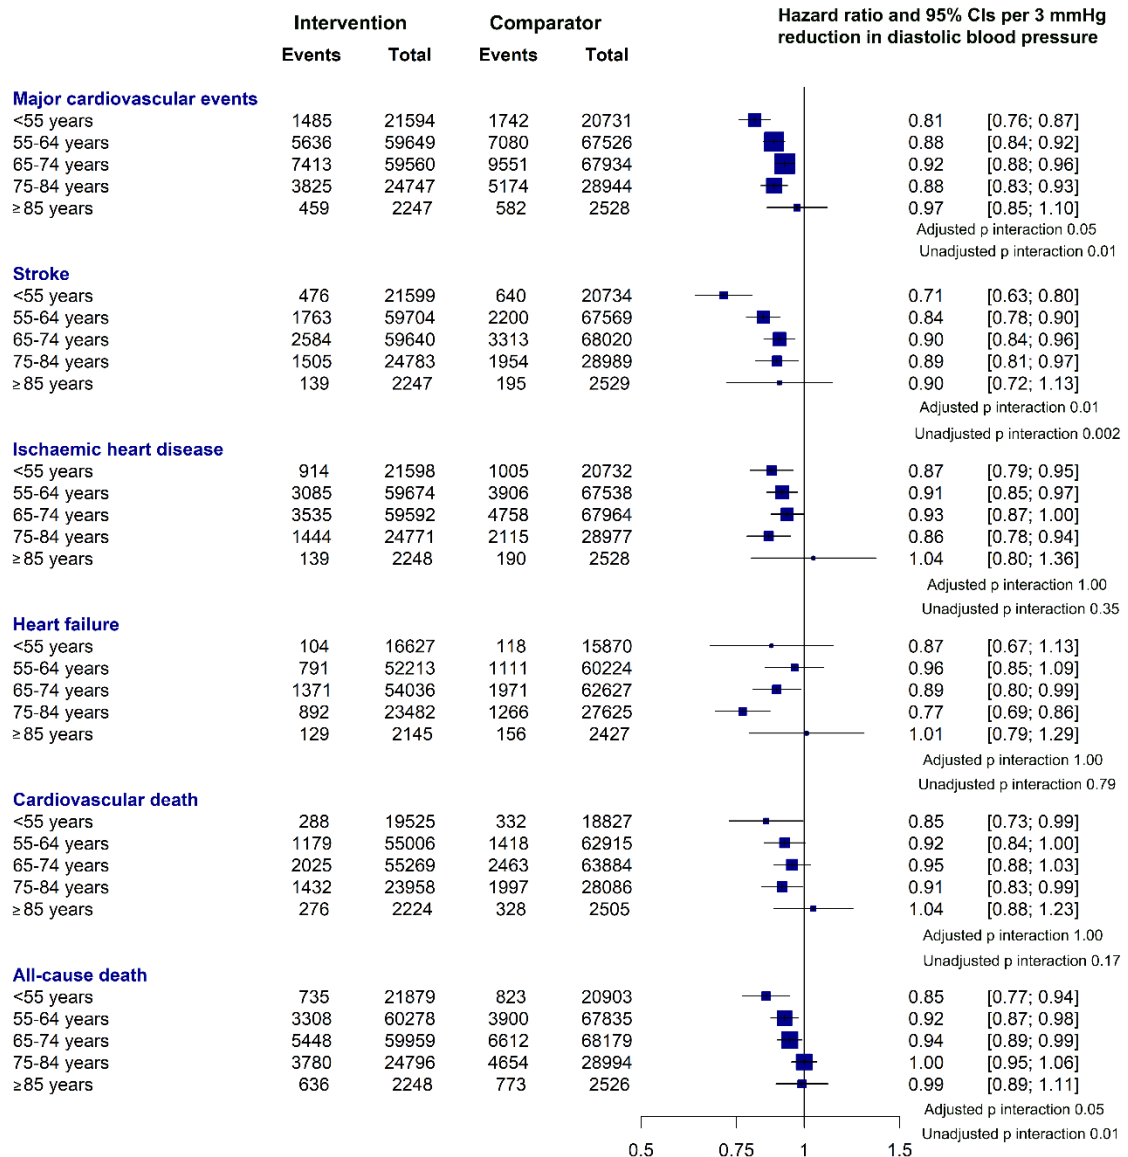

Figure S2. Age-specific relative effects of blood pressure-lowering treatment on all-cause death, by systolic blood pressure categories at baseline.

Forest plot shows the hazard ratios and 95% confidence intervals (CI) per 5 mmHg reduction in systolic blood pressure. Adjusted p interaction: adjusted for multiple testing using Hommel's method. Unadjusted p interaction: unadjusted for multiple testing

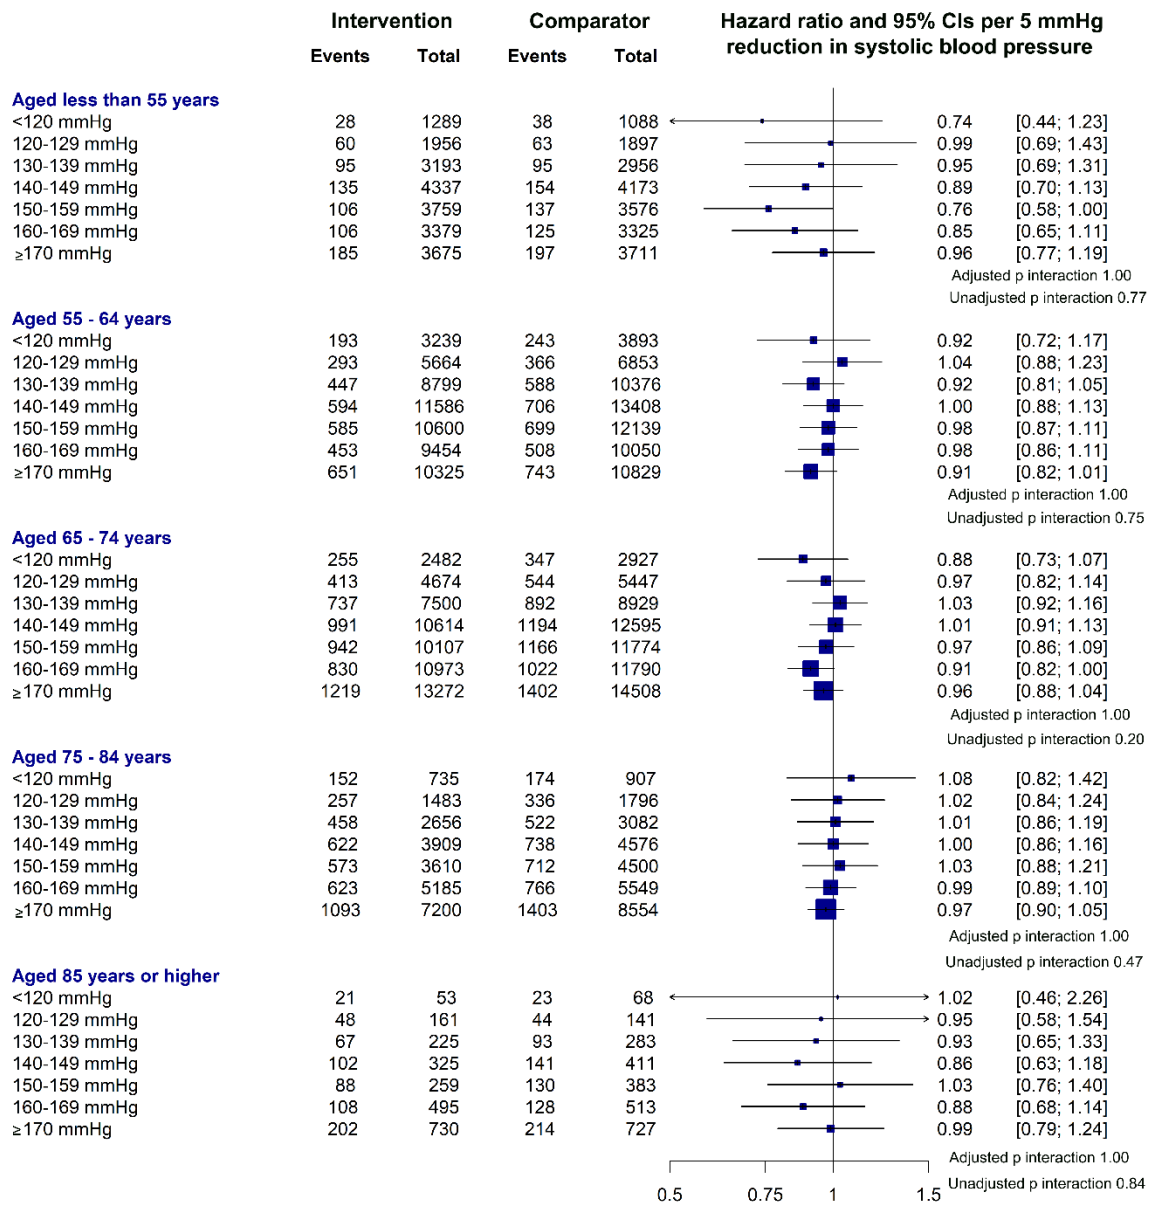

Figure S3. Age-specific relative effects of blood pressure-lowering treatment on all-cause death, by diastolic blood pressure categories at baseline.

Forest plot shows the hazard ratios and 95% confidence intervals (CI) per 3 mmHg reduction in diastolic blood pressure. Adjusted p interaction: adjusted for multiple testing using Hommel's method. Unadjusted p interaction: unadjusted for multiple testing

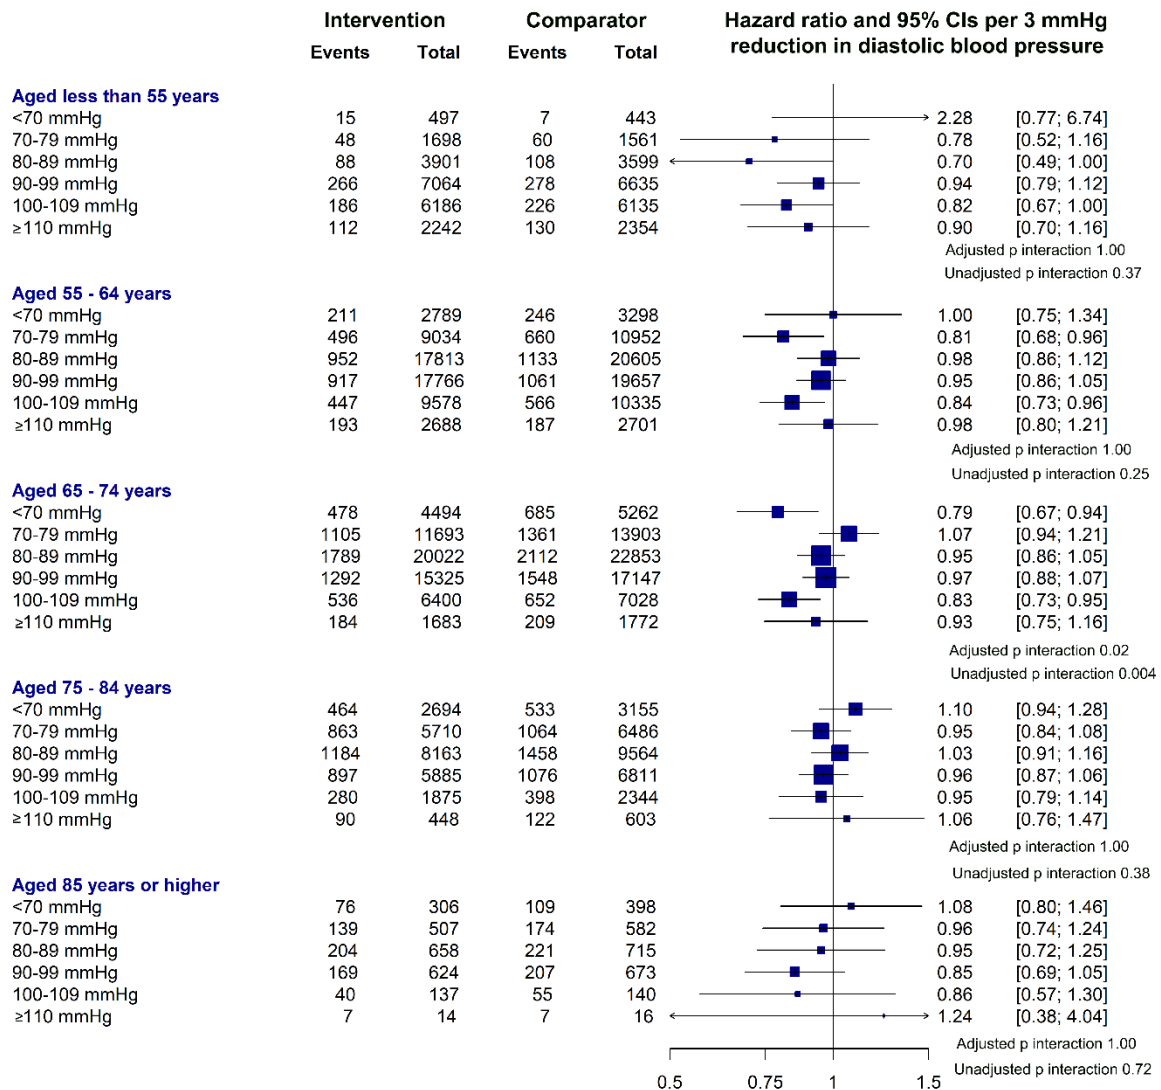

Figure S4. The unstandardised effects of blood pressure-lowering treatment on risk of primary and secondary outcomes stratified by age categories.

Forest plot shows the hazard ratios and 95% confidence intervals (CI), separately for each outcome. Adjusted p interaction: adjusted for multiple testing using Hommel's method. Unadjusted p interaction: unadjusted for multiple testing

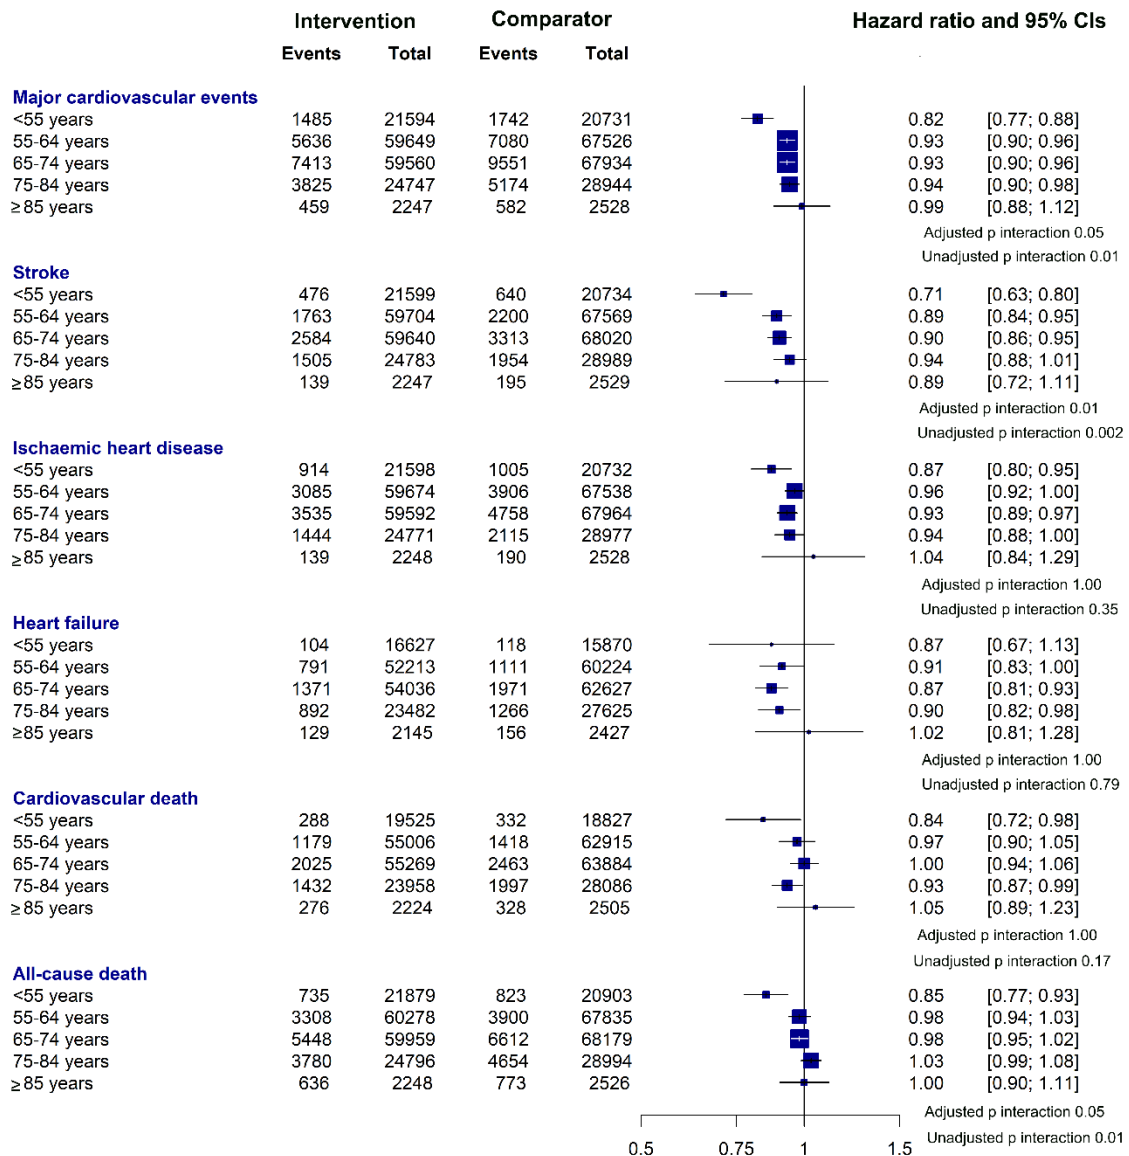

## References

- 1 Appel LJ, Wright JT, Greene T. Intensive blood-pressure control in hypertensive chronic kidney disease. *N Engl J Med* 2010; **363**: 2565–6.
- 2 Schrier RW, Estacio RO, Jeffers B. Appropriate blood pressure control in NIDDM (ABCD) Trial. In: *Diabetologia*. 1996: 1646–54.
- 3 Cushman WC, Evans GW, Byington RP, *et al*. Effects of intensive blood-pressure control in type 2 diabetes mellitus. *N Engl J Med* 2010; **362**: 1575–85.
- 4 Yusuf S, Healey JS, Pogue J, *et al*. Irbesartan in patients with atrial fibrillation. *N Engl J Med* 2011; **364**: 928–38.
- 5 Patel A. Effects of a fixed combination of perindopril and indapamide on macrovascular and microvascular outcomes in patients with type 2 diabetes mellitus (the ADVANCE trial): a randomised controlled trial. *Lancet* 2007; **370**: 829–40.
- 6 Group TAO and C for the ACR, Coordinators TAO and, Antihypertensive T, Treatment L. Major Outcomes in High-Risk Hypertensive Patients Randomized to Angiotensin-Converting Enzyme Inhibitor or Calcium Channel Blocker vs Diuretic. *JAMA J Am Med Assoc* 2002; **288**: 2981–97.
- 7 Doyle AE. The Australian National blood pressure study. *Trends Pharmacol Sci* 1981; **2**: 293–6.
- 8 Wing LMH, Reid CM, Ryan P, *et al*. A comparison of outcomes with angiotensin-converting-enzyme inhibitors and diuretics for hypertension in the elderly. *N Engl J Med* 2003; **348**: 583–92.
- 9 Dahlöf B, Sever PS, Poulter NR, *et al*. Prevention of cardiovascular events with an antihypertensive regimen of amlodipine adding perindopril as required versus atenolol adding bendroflumethiazide as required, in the Anglo-Scandinavian Cardiac Outcomes Trial-Blood Pressure Lowering Arm (ASCOT-B. *Lancet* 2005; **366**: 895–906.
- 10 Ruggenenti P, Fassi A, Ilieva AP, *et al*. Preventing microalbuminuria in type 2 diabetes. *N Engl J Med* 2004; **351**: 1941–51.
- 11 Park S, Yan P, Cerezo C, Jeffers BW. Effect of visit-to-visit blood pressure variability on cardiovascular events in patients with coronary artery disease and well-controlled blood pressure. *J Am Soc Hypertens* 2016; **10**: 799–810.
- 12 Hansson L, Lindholm LH, Niskanen L, *et al*. Effect of angiotensin-converting-enzyme inhibition compared with conventional therapy on cardiovascular morbidity and mortality in hypertension: the Captopril Prevention Project (CAPPP) randomised trial. *Lancet* 1999; **353**: 611–6.
- 13 Verdecchia P, Staessen JA, Angeli F, *et al*. Usual versus tight control of systolic blood pressure in non-diabetic patients with hypertension (Cardio-Sis): an open-label randomised trial. *Lancet* 2009; **374**: 525–33.
- 14 Nakao K, Hirata M, Oba K, *et al*. Role of diabetes and obesity in outcomes of the candesartan antihypertensive survival evaluation in Japan (CASE-J) trial. *Hypertens Res* 2010; **33**: 600–6.
- 15 Ogihara T, Saruta T, Rakugi H, *et al*. Combinations of olmesartan and a calciumchannel blocker or a diuretic inelderly hypertensive patients: A randomized, controlled trial. *J Hypertens* 2014; **32**: 2054–63.
- 16 Black HR, Elliott WJ, Grandits G, *et al*. Principal Results of the Controlled Onset Verapamil

- Investigation of Cardiovascular End Points (CONVINCE) Trial. *J Am Med Assoc* 2003; **289**: 2073–82.
- 17 Matsuzaki M, Ogihara T, Umemoto S, *et al.* Prevention of cardiovascular events with calcium channel blocker-based combination therapies in patients with hypertension: A randomized controlled trial. *J Hypertens* 2011; **29**: 1649–59.
  - 18 Marre M, Lievre M, Chatellier G, Mann JFE, Passa P, Ménard J. Effects of low dose ramipril on cardiovascular and renal outcomes in patients with type 2 diabetes and raised excretion of urinary albumin: Randomised, double blind, placebo controlled trial (the DIABHYCAR study). *Br Med J* 2004; **328**: 495–9.
  - 19 Koudstaal PJ, Algra A, Pop GA, Kappelle LJ, van Latum JC, van Gijn J. Risk of cardiac events in atypical transient ischaemic attack or minor stroke. The Dutch TIA Study Group. *Lancet (London, England)* 1992; **340**: 630–3.
  - 20 Suzuki H, Kanno Y, Kanai A, *et al.* Effects of candesartan on cardiovascular outcomes in Japanese hypertensive patients. *Hypertens Res* 2005; **28**: 307–14.
  - 21 Zanchetti A, Bond MG, Hennig M, *et al.* Calcium antagonist lacidipine slows down progression of asymptomatic carotid atherosclerosis: Principal results of the European Lacidipine Study on Atherosclerosis (ELSA), a randomized, double-blind, long-term trial. *Circulation* 2002; **106**: 2422–7.
  - 22 Fox KM, Bertrand M, Ferrari R, *et al.* Efficacy of perindopril in reduction of cardiovascular events among patients with stable coronary artery disease: Randomised, double-blind, placebo-controlled, multicentre trial (the EUROPA study). *Lancet* 2003; **362**: 782–8.
  - 23 Amery A, Brixko P, Clement D, *et al.* MORTALITY AND MORBIDITY RESULTS FROM THE EUROPEAN WORKING PARTY ON HIGH BLOOD PRESSURE IN THE ELDERLY TRIAL. *Lancet* 1985; **325**: 1349–54.
  - 24 Five-Year Findings of the Hypertension Detection and Follow-up Program: I. Reduction in Mortality of Persons With High Blood Pressure, Including Mild Hypertension. *JAMA J Am Med Assoc* 1979; **242**: 2562–71.
  - 25 Kasanuki H, Hagiwara N, Hosoda S, *et al.* Angiotensin II receptor blocker-based vs. non-angiotensin II receptor blocker-based therapy in patients with angiographically documented coronary artery disease and hypertension: The Heart Institute of Japan Candesartan Randomized Trial for Evaluation in. *Eur Heart J* 2009; **30**: 1203–12.
  - 26 Asayama K, Ohkubo T, Metoki H, *et al.* Cardiovascular outcomes in the first trial of antihypertensive therapy guided by self-measured home blood pressure. *Hypertens Res* 2012; **35**: 1102–10.
  - 27 Sharma AM, Pischon T, Engeli S. Effect of ramipril on cardiovascular events in high-risk patients. *N Engl J Med* 2000; **343**.
  - 28 Beckett NS, Peters R, Fletcher AE, *et al.* Treatment of hypertension in patients 80 years of age or older. *N Engl J Med* 2008; **358**: 1887–98.
  - 29 Lewis EJ, Hunsicker LG, Clarke WR, *et al.* Renoprotective effect of the angiotensin-receptor antagonist irbesartan in patients with nephropathy due to type 2 diabetes. *N Engl J Med* 2001; **345**: 851–60.
  - 30 Brown MJ, Palmer CR, Castaigne A, *et al.* Morbidity and mortality in patients randomised to double-blind treatment with a long-acting calcium-channel blocker or diuretic in the

- International Nifedipine GITS study: Intervention as a Goal in Hypertension Treatment (INSIGHT). *Lancet* 2000; **356**: 366–72.
- 31 Pepine CJ, Handberg EM, Cooper-DeHoff RM, *et al.* A Calcium Antagonist vs a Non-Calcium Antagonist Hypertension Treatment Strategy for Patients with Coronary Artery Disease the International Verapamil-Trandolapril Study (INVEST): A Randomized Controlled Trial. *J Am Med Assoc* 2003; **290**: 2805–16.
  - 32 Yui Y, Sumiyoshi T, Kodama K, *et al.* Comparison of nifedipine retard with angiotensin converting enzyme inhibitors in Japanese hypertensive patients with coronary artery disease: The Japan Multicenter Investigation for Cardiovascular Diseases-B (JMIC-B) randomized trial. *Hypertens Res* 2004; **27**: 181–91.
  - 33 Lindholm LH, Ibsen H, Dahlöf B, *et al.* Cardiovascular morbidity and mortality in patients with diabetes in the Losartan Intervention For Endpoint reduction in hypertension study (LIFE): A randomised trial against atenolol. *Lancet* 2002; **359**: 1004–10.
  - 34 Schrader J, Lüders S, Kulschewski A, *et al.* Morbidity and mortality after stroke, eprosartan compared with nitrendipine for secondary prevention: Principal results of a prospective randomized controlled study (MOSES). *Stroke* 2005; **36**: 1218–24.
  - 35 Kuramoto K. Randomized double-blind comparison of a calcium antagonist and a diuretic in elderly hypertensives: National intervention cooperative study in elderly hypertensives study group. *Hypertension* 1999; **34**: 1129–33.
  - 36 Hansson L, Hedner T, Lund-Johansen P, *et al.* Randomised trial of effects of calcium antagonists compared with diuretics and  $\beta$ -blockers on cardiovascular morbidity and mortality in hypertension: The Nordic Diltiazem (NORDIL) study. *Lancet* 2000; **356**: 359–65.
  - 37 Yusuf S, Teo KK, Pogue J, *et al.* Telmisartan, ramipril, or both in patients at high risk for vascular events. *N Engl J Med* 2008; **358**: 1547–59.
  - 38 MacMahon S, Sharpe N, Gamble G, *et al.* Randomized, placebo-controlled trial of the angiotensin-converting enzyme inhibitor, ramipril, in patients with coronary or other occlusive arterial disease. *J Am Coll Cardiol* 2000; **36**: 438–43.
  - 39 Braunwald E, Domanski MJ, Fowler SE, *et al.* Angiotensin-converting-enzyme inhibition in stable coronary artery disease. *N Engl J Med* 2004; **351**. DOI:10.1056/NEJMoa042739.
  - 40 Asselbergs FW, Diercks GFH, Hillege HL, *et al.* Effects of fosinopril and pravastatin on cardiovascular events in subjects with microalbuminuria. *Circulation* 2004; **110**: 2809–16.
  - 41 Eleuteri E. Effect of amlodipine on the progression of atherosclerosis and the occurrence of clinical events. *Ital Heart J Suppl* 2001; **2**: 85–6.
  - 42 Sacco RL, Diener HC, Yusuf S, *et al.* Aspirin and extended-release dipyridamole versus clopidogrel for recurrent stroke. *N Engl J Med* 2008; **359**: 1238–51.
  - 43 MacMahon S, Neal B, Tzourio C, *et al.* Randomised trial of a perindopril-based blood-pressure-lowering regimen among 6105 individuals with previous stroke or transient ischaemic attack. *Lancet* 2001; **358**: 1033–41.
  - 44 Ogihara T, Nakao K, Fukui T, *et al.* Effects of candesartan compared with amlodipine in hypertensive patients with high cardiovascular risks: Candesartan antihypertensive survival evaluation in Japan trial. *Hypertension* 2008; **51**: 393–8.
  - 45 The SPRINT Research Group. A Randomized Trial of Intensive versus Standard Blood-Pressure Control. *N Engl J Med* 2015; **373**: 2103–16.

- 46 Hansson L, Lindholm LH, Ekblom T, *et al.* Randomised trial of old and new antihypertensive drugs in elderly patients: Cardiovascular mortality and morbidity the Swedish trial in old patients with hypertension-2 study. *Lancet* 1999; **354**: 1751–6.
- 47 JA S, R F, L T, *et al.* Randomised double-blind comparison of placebo and active treatment for older patients with isolated systolic hypertension. The Systolic Hypertension in Europe (Syst-Eur) Trial Investigators. *Lancet (London, England)* 1997; **350**: 757–64.
- 48 Telmisartan T, Assessment R. Effects of the angiotensin-receptor blocker telmisartan on cardiovascular events in high-risk patients intolerant to angiotensin-converting enzyme inhibitors: a randomised controlled trial. *Lancet* 2008; **372**: 1174–83.
- 49 Tight blood pressure control and risk of macrovascular and microvascular complications in type 2 diabetes: UKPDS 38. UK Prospective Diabetes Study Group. *BMJ* 1998; **317**: 703–13.
- 50 Ogihara T, Saruta T, Rakugi H, *et al.* Target blood pressure for treatment of isolated systolic hypertension in the elderly: Valsartan in elderly isolated systolic hypertension study. *Hypertension* 2010; **56**: 196–202.
- 51 Julius S, Kjeldsen SE, Weber M, *et al.* Outcomes in hypertensive patients at high cardiovascular risk treated with regimens based on valsartan or amlodipine: The VALUE randomised trial. *Lancet* 2004; **363**: 2022–31.
- 52 Zanchetti A, Agabiti Rosei E, Dal Palù C, Leonetti G, Magnani B, Pessina A. The Verapamil in Hypertension and Atherosclerosis Study (VHAS): Results of long-term randomized treatment with either verapamil or chlorthalidone on carotid intima-media thickness. *J Hypertens* 1998; **16**: 1667–76.
